# Supplementary material for: Detection of Target Genes for Drug Repurposing to Treat Skeletal Muscle Atrophy in Mice Flown in Spaceflight
Source: MDPI journal article supplement (doi:10.3390/genes13030473), 2022-03-08
Supplement: s1 [file s1]

Table S1. Network measures for the 473 genes in the Gene Disease Knowledge Graph (GDKG).

| Genes          | Degree Distribution | Neighborhood Connectivity | Eigenvector Centrality | Subgraph Centrality         |
|----------------|---------------------|---------------------------|------------------------|-----------------------------|
| <i>GNAS</i>    | 171                 | 64.95238095               | 0.061247409            | $5.20323 \times 10^{30}$    |
| <i>NEU1</i>    | 168                 | 65.33928571               | 0.069736994            | $6.74566 \times 10^{30}$    |
| <i>CSNK2B</i>  | 166                 | 69                        | 0.067660944            | $6.35 \times 10^{30}$       |
| <i>BAG6</i>    | 162                 | 70.40666667               | 0.066949119            | $6.2171 \times 10^{30}$     |
| <i>FTO</i>     | 152                 | 71.10638298               | 0.06282446             | $5.47464 \times 10^{30}$    |
| <i>FXR2</i>    | 149                 | 69.73722628               | 0.059887443            | $4.97473 \times 10^{30}$    |
| <i>EIF4A1</i>  | 149                 | 69.73722628               | 0.059887443            | $4.97473 \times 10^{30}$    |
| <i>SUOX</i>    | 1 <sup>29</sup>     | 73.32283465               | 0.05781322             | $4.63609 \times 10^{30}$    |
| <i>SMARCA4</i> | 1 <sup>29</sup>     | 73.16                     | 0.057042437            | $4.5133 \times 10^{30}$     |
| <i>PRDX5</i>   | 125                 | 74.856                    | 0.058613247            | $4.765^{29} \times 10^{30}$ |
| <i>SPPL3</i>   | 124                 | 78.63709677               | 0.060269574            | $5.03842 \times 10^{30}$    |
| <i>EIF2S2</i>  | 123                 | 76.51219512               | 0.060038049            | $4.99978 \times 10^{30}$    |
| <i>ASH1L</i>   | 123                 | 88.9245283                | 0.05931309             | $4.87977 \times 10^{30}$    |
| <i>DDX6</i>    | 121                 | 62.95867769               | 0.046722122            | $5.20323 \times 10^{30}$    |
| <i>RPS26</i>   | 117                 | 48.30769231               | 0.035899678            | $1.78764 \times 10^{30}$    |
| <i>RAB5B</i>   | 117                 | 48.30769231               | 0.035899678            | $1.78764 \times 10^{30}$    |
| <i>PA2G4</i>   | 114                 | 79.59821429               | 0.055118759            | $4.21402 \times 10^{30}$    |
| <i>ABCF1</i>   | 113                 | 79.83168317               | 0.050157428            | $3.48954 \times 10^{30}$    |
| <i>RPL7A</i>   | 108                 | 81.50925926               | 0.054425               | $6.35 \times 10^{30}$       |
| <i>SURF4</i>   | 107                 | 91.52631579               | 0.053615385            | $3.98728 \times 10^{30}$    |
| <i>MRPL4</i>   | 103                 | 52.45631068               | 0.034347373            | $1.63638 \times 10^{30}$    |
| <i>MTMR3</i>   | 103                 | 97.42857143               | 0.055131951            | $4.21604 \times 10^{30}$    |
| <i>MRPS18B</i> | 101                 | 79.83168317               | 0.050157428            | $3.48954 \times 10^{30}$    |
| <i>FAF1</i>    | 101                 | 98.4494382                | 0.053760546            | $4.0089 \times 10^{30}$     |
| <i>PICK1</i>   | 101                 | 72.32222222               | 0.039143521            | $2.12529 \times 10^{30}$    |
| <i>ACTR2</i>   | 100                 | 100.0454545               | 0.054018587            | $4.04748 \times 10^{30}$    |
| <i>SMAD4</i>   | 97                  | 88.47252747               | 0.049546408            | $3.40504 \times 10^{30}$    |
| <i>PMPCA</i>   | 93                  | 106.5555556               | 0.053951696            | $4.03746 \times 10^{30}$    |
| <i>RPL18</i>   | 93                  | 83.58064516               | 0.04833176             | $2.36829 \times 10^{30}$    |
| <i>NRBP1</i>   | 88                  | 95.68604651               | 0.051190181            | $3.63472 \times 10^{30}$    |
| <i>RPS9</i>    | 86                  | 95.62857143               | 0.040744533            | $2.3027 \times 10^{30}$     |
| <i>LMAN2</i>   | 85                  | 105.4819277               | 0.053979513            | $4.04162 \times 10^{30}$    |
| <i>SAMM50</i>  | 84                  | 100.5                     | 0.044542522            | $2.75199 \times 10^{30}$    |
| <i>PSMD13</i>  | 84                  | 61.66666667               | 0.03075417             | $1.31192 \times 10^{30}$    |
| <i>CUX1</i>    | 83                  | 103.9130435               | 0.044947966            | $2.80232 \times 10^{30}$    |
| <i>MAP2K1</i>  | 82                  | 110.6818182               | 0.045447749            | $2.86499 \times 10^{30}$    |
| <i>DNLZ</i>    | 81                  | 106.5555556               | 0.053951696            | $4.03746 \times 10^{30}$    |
| <i>RANGAP1</i> | 78                  | 107.1052632               | 0.049938988            | $3.45921 \times 10^{30}$    |
| <i>CNEP1R1</i> | 78                  | 87.28205128               | 0.041320756            | $2.36829 \times 10^{30}$    |
| <i>MTCH2</i>   | 77                  | 106.9733333               | 0.048081822            | $3.20671 \times 10^{30}$    |
| <i>ACO2</i>    | 76                  | 108.1369863               | 0.048953139            | $3.32398 \times 10^{30}$    |

|                 |    |             |             |                          |
|-----------------|----|-------------|-------------|--------------------------|
| <i>POLR2E</i>   | 76 | 92.67105263 | 0.042469675 | $2.36829 \times 10^{30}$ |
| <i>MAPKAPK5</i> | 73 | 105.2465753 | 0.046861906 | $2.57655 \times 10^{30}$ |
| <i>IGF2R</i>    | 72 | 134.0784314 | 0.041501652 | $2.38907 \times 10^{30}$ |
| <i>COL4A2</i>   | 71 | 112.1967213 | 0.040889503 | $2.31911 \times 10^{30}$ |
| <i>SPTBN1</i>   | 70 | 104.4626866 | 0.043099323 | $2.57655 \times 10^{30}$ |
| <i>COL4A1</i>   | 70 | 113.4029851 | 0.046439171 | $2.99135 \times 10^{30}$ |
| <i>CHMP1A</i>   | 70 | 111.3571429 | 0.048322306 | $3.23887 \times 10^{30}$ |
| <i>TIMMDC1</i>  | 70 | 53.31428571 | 0.022899714 | $7.27374 \times 10^{29}$ |
| <i>VEGFB</i>    | 68 | 69.14705882 | 0.029773989 | $1.22962 \times 10^{30}$ |
| <i>ARPC2</i>    | 67 | 105.4328358 | 0.043719679 | $2.65126 \times 10^{30}$ |
| <i>HCFC1</i>    | 67 | 118.1875    | 0.046280893 | $2.97099 \times 10^{30}$ |
| <i>PPM1G</i>    | 67 | 60          | 0.025356748 | $8.91836 \times 10^{29}$ |
| <i>GOPC</i>     | 67 | 136.1636364 | 0.045568478 | $2.88023 \times 10^{30}$ |
| <i>TOM1</i>     | 67 | 130.6491228 | 0.045680939 | $2.89446 \times 10^{30}$ |
| <i>TAX1BP1</i>  | 66 | 114.4814815 | 0.037460858 | $1.9465 \times 10^{30}$  |
| <i>DMXL1</i>    | 66 | 110.5238095 | 0.043166125 | $3.23887 \times 10^{30}$ |
| <i>ABCC9</i>    | 65 | 117.1612903 | 0.044836925 | $2.78849 \times 10^{30}$ |
| <i>NDUFS3</i>   | 65 | 67.12307692 | 0.02616828  | $9.49835 \times 10^{29}$ |
| <i>VDAC1</i>    | 65 | 55.07692308 | 0.021406579 | $6.35613 \times 10^{29}$ |
| <i>MYH7</i>     | 65 | 119.1129032 | 0.045625898 | $2.88749 \times 10^{30}$ |
| <i>NCBP1</i>    | 65 | 129.6470588 | 0.04064183  | $2.2911 \times 10^{30}$  |
| <i>SLAIN2</i>   | 63 | 114.5614035 | 0.039662096 | $2.18197 \times 10^{30}$ |
| <i>REST</i>     | 63 | 116.65      | 0.042527265 | $2.50861 \times 10^{30}$ |
| <i>UQCC2</i>    | 63 | 101.031746  | 0.038304953 | $2.06241 \times 10^{30}$ |
| <i>LARP4B</i>   | 63 | 152.1428571 | 0.038863267 | $2.06241 \times 10^{30}$ |
| <i>SF3A3</i>    | 62 | 130.1538462 | 0.040797436 | $2.30868 \times 10^{30}$ |
| <i>PKD2</i>     | 61 | 136.6538462 | 0.043663338 | $2.64443 \times 10^{30}$ |
| <i>SND1</i>     | 61 | 135.8305085 | 0.050096612 | $3.48109 \times 10^{30}$ |
| <i>IRF2BP1</i>  | 60 | 100.3       | 0.036291701 | $1.82689 \times 10^{30}$ |
| <i>PTTG1</i>    | 60 | 48.43333333 | 0.01720394  | $4.10538 \times 10^{29}$ |
| <i>MARK3</i>    | 60 | 129.5172414 | 0.045132088 | $2.82533 \times 10^{30}$ |
| <i>RNF181</i>   | 59 | 113.9152542 | 0.040704228 | $2.29814 \times 10^{30}$ |
| <i>PRMT5</i>    | 58 | 140.6086957 | 0.038560157 | $2.06241 \times 10^{30}$ |
| <i>COG6</i>     | 58 | 114.9285714 | 0.038754777 | $2.08328 \times 10^{30}$ |
| <i>DDA1</i>     | 57 | 114.1578947 | 0.03960289  | $2.17546 \times 10^{30}$ |
| <i>DCAF12</i>   | 57 | 158.8       | 0.043655999 | $2.64354 \times 10^{30}$ |
| <i>PDE4DIP</i>  | 57 | 119.3508772 | 0.042179134 | $2.4677 \times 10^{30}$  |
| <i>KPNB1</i>    | 56 | 122.3333333 | 0.039219072 | $2.1335 \times 10^{30}$  |
| <i>COPS6</i>    | 56 | 71.16071429 | 0.024247173 | $8.15493 \times 10^{29}$ |
| <i>LLGL1</i>    | 56 | 143.1136364 | 0.037574991 | $1.95837 \times 10^{30}$ |
| <i>MSL2</i>     | 55 | 118.3018868 | 0.036588654 | $1.85691 \times 10^{30}$ |
| <i>ZKSCAN1</i>  | 55 | 133.245283  | 0.042921168 | $2.55529 \times 10^{30}$ |
| <i>ZC3H18</i>   | 55 | 156.3333333 | 0.042952315 | $2.559 \times 10^{30}$   |
| <i>EIF4B</i>    | 54 | 140.952381  | 0.035524871 | $1.7505 \times 10^{30}$  |
| <i>TRIP11</i>   | 53 | 129.6981132 | 0.042607277 | $2.51806 \times 10^{30}$ |

|                          |    |             |             |                          |
|--------------------------|----|-------------|-------------|--------------------------|
| <i>CTDSP1</i>            | 52 | 126.4423077 | 0.040437973 | $2.26818 \times 10^{30}$ |
| <i>RANBP2</i>            | 52 | 130.5961538 | 0.041950444 | $2.44102 \times 10^{30}$ |
| <i>ETF1</i>              | 52 | 153.8       | 0.03665473  | $1.86362 \times 10^{30}$ |
| <i>EIF3H</i>             | 52 | 142.3809524 | 0.036004937 | $1.79813 \times 10^{30}$ |
| <i>MRPL9</i>             | 50 | 65.36       | 0.019456234 | $5.25068 \times 10^{29}$ |
| <i>GTF2I</i>             | 49 | 80.59183673 | 0.024132093 | $6.35 \times 10^{30}$    |
| <i>SNRPC</i>             | 48 | 140.2291667 | 0.040414075 | $2.2655 \times 10^{30}$  |
| <i>FEM1A</i>             | 48 | 130.8333333 | 0.038172071 | $2.02111 \times 10^{30}$ |
| <i>NF2</i>               | 48 | 138         | 0.040102593 | $2.23071 \times 10^{30}$ |
| <i>PSMD6</i>             | 48 | 176.4736842 | 0.040747822 | $2.30307 \times 10^{30}$ |
| <i>USP24</i>             | 47 | 148.5909091 | 0.039469325 | $2.16081 \times 10^{30}$ |
| <i>TRAK1</i>             | 47 | 171.7714286 | 0.036298728 | $1.8276 \times 10^{30}$  |
| <i>RABEP1</i>            | 47 | 140.4444444 | 0.037294732 | $2.2655 \times 10^{30}$  |
| <i>FKBP8</i>             | 47 | 159.0810811 | 0.034965219 | $2.35786 \times 10^{30}$ |
| <i>RYK</i>               | 47 | 156.1621622 | 0.034614165 | $2.35786 \times 10^{30}$ |
| <i>RPL8</i>              | 45 | 165.6046512 | 0.043635755 | $2.64109 \times 10^{30}$ |
| <i>PRPF6</i>             | 45 | 162.3023256 | 0.041992985 | $2.44597 \times 10^{30}$ |
| <i>DEF8</i>              | 45 | 133.6666667 | 0.036373637 | $1.83515 \times 10^{30}$ |
| <i>ATG4D</i>             | 45 | 147.3953488 | 0.037441563 | $1.94449 \times 10^{30}$ |
| <i>UBE3B</i>             | 45 | 160.547619  | 0.04046323  | $2.27101 \times 10^{30}$ |
| <i>SP2</i>               | 45 | 159.6046512 | 0.041229725 | $2.35786 \times 10^{30}$ |
| <i>CKAP5</i>             | 45 | 158.1190476 | 0.040038435 | $2.35786 \times 10^{30}$ |
| <i>ZFP91</i>             | 44 | 165.2195122 | 0.041521483 | $2.39135 \times 10^{30}$ |
| <i>NPR2</i>              | 44 | 177.4285714 | 0.045962471 | $2.93025 \times 10^{30}$ |
| <i>FXR1</i>              | 44 | 154.4285714 | 0.039173881 | $2.12859 \times 10^{30}$ |
| <i>CUL4A</i>             | 44 | 144.547619  | 0.035273385 | $1.72581 \times 10^{30}$ |
| <i>ALKBH5</i>            | 44 | 143.1136364 | 0.037574991 | $1.95837 \times 10^{30}$ |
| <i>CDC42</i>             | 44 | 93.5        | 0.02391507  | $7.93307 \times 10^{29}$ |
| <i>SPNS1</i>             | 43 | 161         | 0.039724379 | $2.18883 \times 10^{30}$ |
| <i>EIF5A</i>             | 43 | 155.0540541 | 0.034066214 | $1.6097 \times 10^{30}$  |
| <i>PHACTR2</i>           | 43 | 153.195122  | 0.037347297 | $1.93471 \times 10^{30}$ |
| <i>MRPS<sup>30</sup></i> | 43 | 173.0909091 | 0.033746552 | $1.57964 \times 10^{30}$ |
| <i>GSTM5</i>             | 42 | 171.25      | 0.032571766 | $1.47157 \times 10^{30}$ |
| <i>ALS2</i>              | 42 | 155.1666667 | 0.040068929 | $2.22697 \times 10^{30}$ |
| <i>TNNT3</i>             | 42 | 132.5952381 | 0.033538853 | $1.56025 \times 10^{30}$ |
| <i>CUL1</i>              | 42 | 173.05      | 0.042271442 | $2.47852 \times 10^{30}$ |
| <i>NUCKS1</i>            | 42 | 88.95238095 | 0.022356415 | $6.9327 \times 10^{29}$  |
| <i>TRIP12</i>            | 42 | 155.1666667 | 0.040068929 | $2.22697 \times 10^{30}$ |
| <i>QRICH1</i>            | 42 | 151.875     | 0.035663515 | $1.76419 \times 10^{30}$ |
| <i>NFIX</i>              | 42 | 171.725     | 0.041245411 | $2.35966 \times 10^{30}$ |
| <i>ASCC2</i>             | 42 | 166.375     | 0.04034182  | $2.2574 \times 10^{30}$  |
| <i>HECTD1</i>            | 42 | 155.1666667 | 0.040068929 | $2.22697 \times 10^{30}$ |
| <i>NAA10</i>             | 42 | 68.16666667 | 0.017036415 | $4.02582 \times 10^{29}$ |
| <i>ANP32E</i>            | 41 | 148.2307692 | 0.033977522 | $1.95837 \times 10^{30}$ |
| <i>SPAG7</i>             | 40 | 88.325      | 0.021229175 | $6.25121 \times 10^{29}$ |

|                          |    |             |             |                          |
|--------------------------|----|-------------|-------------|--------------------------|
| <i>GTPBP1</i>            | 40 | 201.75      | 0.033628316 | $1.56859 \times 10^{30}$ |
| <i>SLC25A11</i>          | 40 | 88.325      | 0.021229175 | $6.25121 \times 10^{29}$ |
| <i>FAM53C</i>            | 40 | 153.8       | 0.03665473  | $1.86362 \times 10^{30}$ |
| <i>GNS</i>               | 40 | 201.75      | 0.033628316 | $1.56859 \times 10^{30}$ |
| <i>NONO</i>              | 40 | 201.75      | 0.033628316 | $1.56859 \times 10^{30}$ |
| <i>ANAPC1</i>            | 40 | 164.0526316 | 0.036423441 | $1.84018 \times 10^{30}$ |
| <i>PPP1R15B</i>          | 40 | 201.75      | 0.033628316 | $1.56859 \times 10^{30}$ |
| <i>FOXO4</i>             | 40 | 201.75      | 0.033628316 | $1.56859 \times 10^{30}$ |
| <i>GSPT1</i>             | 40 | 148.2       | 0.035659453 | $1.76379 \times 10^{30}$ |
| <i>SNAP<sup>29</sup></i> | 39 | 195         | 0.033690059 | $1.57435 \times 10^{30}$ |
| <i>EIF4H</i>             | 39 | 58.35897436 | 0.013410095 | $2.49437 \times 10^{29}$ |
| <i>SNX19</i>             | 39 | 174.5405405 | 0.038961202 | $2.10554 \times 10^{30}$ |
| <i>NOC2L</i>             | 39 | 203.4444444 | 0.032708443 | $1.48394 \times 10^{30}$ |
| <i>CRKL</i>              | 39 | 195         | 0.033690059 | $1.57435 \times 10^{30}$ |
| <i>NDUFS2</i>            | 39 | 65.92307692 | 0.014343859 | $2.85384 \times 10^{29}$ |
| <i>UFC1</i>              | 39 | 65.92307692 | 0.014343859 | $2.85384 \times 10^{29}$ |
| <i>EIF3F</i>             | 39 | 48.07692308 | 0.010655328 | $1.78764 \times 10^{30}$ |
| <i>PSMA3</i>             | 38 | 190.1111111 | 0.041166331 | $2.35062 \times 10^{30}$ |
| <i>ACTR10</i>            | 38 | 190.1111111 | 0.041166331 | $2.35062 \times 10^{30}$ |
| <i>TEX2</i>              | 38 | 190.1111111 | 0.041166331 | $2.35062 \times 10^{30}$ |
| <i>USP4</i>              | 38 | 165.0833333 | 0.034812927 | $1.68104 \times 10^{30}$ |
| <i>AP3S2</i>             | 38 | 184.0833333 | 0.040151646 | $2.23617 \times 10^{30}$ |
| <i>OPA1</i>              | 38 | 177.1142857 | 0.037645073 | $1.96569 \times 10^{30}$ |
| <i>RHOA</i>              | 38 | 165.0833333 | 0.034812927 | $1.68104 \times 10^{30}$ |
| <i>UQCR11</i>            | 38 | 158.4736842 | 0.036457749 | $2.35786 \times 10^{30}$ |
| <i>USP5</i>              | 37 | 208.8518519 | 0.033711277 | $1.57633 \times 10^{30}$ |
| <i>TPI1</i>              | 37 | 208.8518519 | 0.033711277 | $1.57633 \times 10^{30}$ |
| <i>PSMB6</i>             | 37 | 72.56756757 | 0.015452455 | $3.31202 \times 10^{29}$ |
| <i>RPL4</i>              | 37 | 160.7567568 | 0.035676782 | $1.76551 \times 10^{30}$ |
| <i>FIP1L1</i>            | 37 | 173.2258065 | 0.031561853 | $1.38173 \times 10^{30}$ |
| <i>ELK4</i>              | 37 | 168.5428571 | 0.034242274 | $1.62638 \times 10^{30}$ |
| <i>PARP1</i>             | 37 | 208.7307692 | 0.032356507 | $1.45218 \times 10^{30}$ |
| <i>USP8</i>              | 37 | 167.5142857 | 0.034804912 | $1.68027 \times 10^{30}$ |
| <i>FBXW2</i>             | 37 | 68.32432432 | 0.014887025 | 65.92307692              |
| <i>MFN2</i>              | 36 | 166.8823529 | 0.03320841  | $1.52966 \times 10^{30}$ |
| <i>RAF1</i>              | 35 | 195.3125    | 0.037727655 | $1.97432 \times 10^{30}$ |
| <i>UBE2M</i>             | 35 | 145.0857143 | 0.030410289 | $1.28274 \times 10^{30}$ |
| <i>MRPL10</i>            | 35 | 99.6        | 0.021393908 | $6.3486 \times 10^{29}$  |
| <i>BRI3</i>              | 35 | 165.2571429 | 0.034645834 | $1.66495 \times 10^{30}$ |
| <i>CHMP2A</i>            | 35 | 145.0857143 | 0.030410289 | $1.28274 \times 10^{30}$ |
| <i>ADRM1</i>             | 35 | 145.0857143 | 0.030410289 | $1.28274 \times 10^{30}$ |
| <i>ATG3</i>              | 34 | 167.78125   | 0.031618316 | $1.38668 \times 10^{30}$ |
| <i>ZDHHC5</i>            | 34 | 163.71875   | 0.030624029 | $1.30084 \times 10^{30}$ |
| <i>CRAT</i>              | 34 | 179.34375   | 0.03411092  | $1.61393 \times 10^{30}$ |
| <i>DCTN2</i>             | 34 | 95.02941176 | 0.019391184 | $5.21563 \times 10^{29}$ |

|                 |    |             |             |                          |
|-----------------|----|-------------|-------------|--------------------------|
| <i>DHX36</i>    | 34 | 206.0645161 | 0.038469584 | $2.05274 \times 10^{30}$ |
| <i>BAP1</i>     | 34 | 168.8235294 | 0.034328001 | $1.63454 \times 10^{30}$ |
| <i>MAPK1</i>    | 33 | 186.1290323 | 0.03370739  | $1.57597 \times 10^{30}$ |
| <i>YWHAE</i>    | 33 | 189.3548387 | 0.034101319 | $1.61302 \times 10^{30}$ |
| <i>COPA</i>     | 33 | 186.1290323 | 0.03370739  | $1.57597 \times 10^{30}$ |
| <i>HSP90AB1</i> | 33 | 184.9354839 | 0.034044412 | $1.60764 \times 10^{30}$ |
| <i>CTDSP2</i>   | 33 | 186.1290323 | 0.03370739  | $1.57597 \times 10^{30}$ |
| <i>POLDIP2</i>  | 33 | 56.81818182 | 0.010230319 | $1.57597 \times 10^{30}$ |
| <i>KLHL7</i>    | 32 | 186.5333333 | 0.032784646 | $1.49087 \times 10^{30}$ |
| <i>ACTR1A</i>   | 32 | 74.875      | 0.013452745 | $2.51027 \times 10^{29}$ |
| <i>CBX1</i>     | 32 | 100.0625    | 0.019309103 | $5.17157 \times 10^{29}$ |
| <i>MPP6</i>     | 31 | 178.4137931 | 0.030107788 | $1.25735 \times 10^{30}$ |
| <i>NCOR1</i>    | 31 | 196.0967742 | 0.036874889 | $1.88608 \times 10^{30}$ |
| <i>TIMM44</i>   | 31 | 210.137931  | 0.036836922 | $1.88219 \times 10^{30}$ |
| <i>AMFR</i>     | 31 | 194.1034483 | 0.032747488 | $1.48749 \times 10^{30}$ |
| <i>CTBP1</i>    | 31 | 210.137931  | 0.036836922 | $1.88219 \times 10^{30}$ |
| <i>AGGF1</i>    | 31 | 210.137931  | 0.036836922 | $1.88219 \times 10^{30}$ |
| <i>CYC1</i>     | 31 | 190.3793103 | 0.032135756 | $1.43244 \times 10^{30}$ |
| <i>KIF1C</i>    | 31 | 210.137931  | 0.036836922 | $1.88219 \times 10^{30}$ |
| <i>LARP1B</i>   | 31 | 210.137931  | 0.036836922 | $1.88219 \times 10^{30}$ |
| <i>ADSSL1</i>   | 31 | 176.6129032 | 0.032611    | $1.47512 \times 10^{30}$ |
| <i>MEF2A</i>    | 31 | 181.8064516 | 0.033836762 | $1.58809 \times 10^{30}$ |
| <i>AUH</i>      | 31 | 197.6896552 | 0.034190547 | $1.62147 \times 10^{30}$ |
| <i>SGCB</i>     | 31 | 210.137931  | 0.036836922 | $1.88219 \times 10^{30}$ |
| <i>RNF6</i>     | 31 | 210.137931  | 0.036836922 | $1.88219 \times 10^{30}$ |
| <i>PACS2</i>    | 31 | 181.8064516 | 0.033836762 | $1.58809 \times 10^{30}$ |
| <i>OXR1</i>     | 31 | 181.8064516 | 0.033836762 | $1.58809 \times 10^{30}$ |
| <i>MED16</i>    | 30 | 196.9285714 | 0.032666072 | $1.4801 \times 10^{30}$  |
| <i>DHX15</i>    | 30 | 188.9285714 | 0.031124808 | $1.34373 \times 10^{30}$ |
| <i>AP3D1</i>    | 30 | 198.6785714 | 0.032870564 | $1.49869 \times 10^{30}$ |
| <i>COX7A2L</i>  | 30 | 61.56666667 | 0.010701196 | $1.58841 \times 10^{29}$ |
| <i>PPP6R3</i>   | 30 | 219.3571429 | 0.037208892 | $1.9204 \times 10^{30}$  |
| <i>RPS18</i>    | 30 | 157.5666667 | 0.028191441 | $1.10238 \times 10^{30}$ |
| <i>GDE1</i>     | 29 | 203.7407407 | 0.031854172 | $1.40744 \times 10^{30}$ |
| <i>COQ9</i>     | 29 | 206.037037  | 0.032854815 | $1.49726 \times 10^{30}$ |
| <i>KIFAP3</i>   | 29 | 206.5925926 | 0.033121325 | $1.52164 \times 10^{30}$ |
| <i>NDUFA8</i>   | 29 | 188.6551724 | 0.032610652 | $1.47508 \times 10^{30}$ |
| <i>LARS</i>     | 29 | 203.7407407 | 0.031854172 | $1.40744 \times 10^{30}$ |
| <i>SNRPB</i>    | 29 | 203.7407407 | 0.031854172 | $1.40744 \times 10^{30}$ |
| <i>ETFA</i>     | 29 | 168.4827586 | 0.028580468 | $1.84018 \times 10^{30}$ |
| <i>JTB</i>      | 28 | 201.75      | 0.033628316 | $1.56859 \times 10^{30}$ |
| <i>PGAM2</i>    | 28 | 103.3214286 | 0.017519124 | $4.25719 \times 10^{29}$ |
| <i>TRAPPC1</i>  | 28 | 201.75      | 0.033628316 | $1.56859 \times 10^{30}$ |
| <i>PITPNB</i>   | 28 | 201.75      | 0.033628316 | $1.56859 \times 10^{30}$ |
| <i>MEF2D</i>    | 27 | 214.52      | 0.031184881 | $1.34892 \times 10^{30}$ |

|                 |    |             |             |                          |
|-----------------|----|-------------|-------------|--------------------------|
| <i>PSMB5</i>    | 27 | 171.7777778 | 0.027098883 | $1.01859 \times 10^{30}$ |
| <i>RPL14</i>    | 27 | 220.7037037 | 0.035965603 | $1.79421 \times 10^{30}$ |
| <i>CAPZB</i>    | 27 | 79.66666667 | 0.012889074 | $2.30431 \times 10^{29}$ |
| <i>RAD23A</i>   | 27 | 101.6666667 | 0.0166569   | $4.25719 \times 10^{29}$ |
| <i>ATP5B</i>    | 26 | 227.4166667 | 0.031742113 | $1.39756 \times 10^{30}$ |
| <i>RPL3L</i>    | 26 | 227.4166667 | 0.031742113 | $1.39756 \times 10^{30}$ |
| <i>DYM</i>      | 26 | 227.4166667 | 0.031742113 | $1.39756 \times 10^{30}$ |
| <i>RPS11</i>    | 26 | 109.4615385 | 0.017282587 | $4.143 \times 10^{29}$   |
| <i>KANSL1L</i>  | 26 | 229.7083333 | 0.032841195 | $1.49601 \times 10^{30}$ |
| <i>HSPA9</i>    | 26 | 212.5       | 0.029835653 | $1.23472 \times 10^{30}$ |
| <i>KLHDC2</i>   | 26 | 223.125     | 0.031104012 | $1.34193 \times 10^{30}$ |
| <i>CCT2</i>     | 26 | 227.4166667 | 0.031742113 | $1.39756 \times 10^{30}$ |
| <i>NDUFV1</i>   | 26 | 229.7083333 | 0.032841195 | $1.49601 \times 10^{30}$ |
| <i>UBQLN4</i>   | 26 | 223.125     | 0.031104012 | $1.34193 \times 10^{30}$ |
| <i>EFCAB14</i>  | 26 | 229.7083333 | 0.032841195 | $1.49601 \times 10^{30}$ |
| <i>E2F6</i>     | 26 | 121.4615385 | 0.018417602 | $4.70505 \times 10^{29}$ |
| <i>SEC13</i>    | 26 | 212.5       | 0.029835653 | $1.23472 \times 10^{30}$ |
| <i>RPL13A</i>   | 26 | 109.4615385 | 0.017282587 | $4.143 \times 10^{29}$   |
| <i>PSMC6</i>    | 26 | 229.7083333 | 0.032841195 | $1.49601 \times 10^{30}$ |
| <i>SNF8</i>     | 26 | 122.4615385 | 0.01925279  | $5.14145 \times 10^{29}$ |
| <i>COX6C</i>    | 26 | 209.2692308 | 0.032471453 | $1.46252 \times 10^{30}$ |
| <i>RPS25</i>    | 26 | 122.4615385 | 0.01925279  | $1.15072 \times 10^{30}$ |
| <i>ARF1</i>     | 26 | 216.4583333 | 0.030574316 | $1.15072 \times 10^{30}$ |
| <i>CNOT4</i>    | 26 | 216.0416667 | 0.030455479 | $1.27464 \times 10^{30}$ |
| <i>NR2C2</i>    | 26 | 228.9166667 | 0.032084141 | $1.49601 \times 10^{30}$ |
| <i>EIF2AK1</i>  | 25 | 238.2       | 0.035934788 | $1.79113 \times 10^{30}$ |
| <i>ABCF2</i>    | 25 | 178.68      | 0.026059561 | $9.41959 \times 10^{29}$ |
| <i>IPO8</i>     | 25 | 238.2       | 0.035934788 | $1.79113 \times 10^{30}$ |
| <i>ARFGEF1</i>  | 25 | 238.2       | 0.035934788 | $1.79113 \times 10^{30}$ |
| <i>DHX8</i>     | 25 | 238.2       | 0.035934788 | $1.79113 \times 10^{30}$ |
| <i>NGLY1</i>    | 25 | 238.2       | 0.035934788 | $1.79113 \times 10^{30}$ |
| <i>UBR1</i>     | 25 | 238.2       | 0.035934788 | $1.79113 \times 10^{30}$ |
| <i>PDS5A</i>    | 25 | 238.2       | 0.035934788 | $1.79113 \times 10^{30}$ |
| <i>CC2D1A</i>   | 25 | 238.2       | 0.035934788 | $1.79113 \times 10^{30}$ |
| <i>RLIM</i>     | 25 | 238.2       | 0.035934788 | $1.79113 \times 10^{30}$ |
| <i>DENND5A</i>  | 25 | 238.2       | 0.035934788 | $1.79113 \times 10^{30}$ |
| <i>USP7</i>     | 25 | 238.2       | 0.035934788 | $1.79113 \times 10^{30}$ |
| <i>NRD1</i>     | 25 | 215.3043478 | 0.028802884 | $1.15072 \times 10^{30}$ |
| <i>SMARCAL1</i> | 25 | 238.2       | 0.035934788 | $1.79113 \times 10^{30}$ |
| <i>IVNS1ABP</i> | 25 | 238.2       | 0.035934788 | $1.79113 \times 10^{30}$ |
| <i>DHX9</i>     | 25 | 238.2       | 0.035934788 | $1.79113 \times 10^{30}$ |
| <i>SDHC</i>     | 25 | 79.36       | 0.011093539 | $1.70702 \times 10^{29}$ |
| <i>SET</i>      | 25 | 79.36       | 0.011093539 | $1.70702 \times 10^{29}$ |
| <i>CLCN4</i>    | 25 | 238.2       | 0.035934788 | $1.79113 \times 10^{30}$ |
| <i>ZMYM5</i>    | 25 | 238.2       | 0.035934788 | $1.79113 \times 10^{30}$ |

|                           |    |             |             |                          |
|---------------------------|----|-------------|-------------|--------------------------|
| <i>EEF1B2</i>             | 25 | 217.24      | 0.032240968 | $1.44183 \times 10^{30}$ |
| <i>G3BP1</i>              | 25 | 238.2       | 0.035934788 | $1.79113 \times 10^{30}$ |
| <i>EIF4ENIF1</i>          | 25 | 238.2       | 0.035934788 | $1.79113 \times 10^{30}$ |
| <i>KDM7A</i>              | 25 | 238.2173913 | 0.031989236 | $1.4194 \times 10^{30}$  |
| <i>NFU1</i>               | 25 | 224.2608696 | 0.030314137 | $1.27464 \times 10^{30}$ |
| <i>PWP1</i>               | 25 | 238.2       | 0.035934788 | $1.79113 \times 10^{30}$ |
| <i>SCN4A</i>              | 25 | 238.2       | 0.035934788 | $1.79113 \times 10^{30}$ |
| <i>EIF4G1</i>             | 25 | 238.2       | 0.035934788 | $1.79113 \times 10^{30}$ |
| <i>EIF1</i>               | 25 | 212.52      | 0.031406076 | $1.36812 \times 10^{30}$ |
| <i>DENND4C</i>            | 25 | 238.2       | 0.035934788 | $1.79113 \times 10^{30}$ |
| <i>LTN1</i>               | 25 | 238.2       | 0.035934788 | $1.79113 \times 10^{30}$ |
| <i>CHMP4B</i>             | 24 | 225.6666667 | 0.032276552 | $1.44501 \times 10^{30}$ |
| <i>NDUFB3</i>             | 24 | 189.5833333 | 0.026575617 | $9.79636 \times 10^{29}$ |
| <i>PRCC</i>               | 24 | 248.6818182 | 0.032252326 | $1.44285 \times 10^{30}$ |
| <i>MRPS31</i>             | 24 | 137.375     | 0.018942288 | $4.97694 \times 10^{29}$ |
| <i>SLC2A4</i>             | 24 | 248.6818182 | 0.032252326 | $1.44285 \times 10^{30}$ |
| <i>COX4I1</i>             | 24 | 189.5833333 | 0.026575617 | $9.79636 \times 10^{29}$ |
| <i>EMC2</i>               | 23 | 239.6190476 | 0.029455611 | $1.20347 \times 10^{30}$ |
| <i>RPL35</i>              | 23 | 88.52173913 | 0.011201492 | $1.7404 \times 10^{29}$  |
| <i>ARPC5L</i>             | 23 | 88.52173913 | 0.011201492 | $1.7404 \times 10^{29}$  |
| <i>MAP4K5</i>             | 22 | 255.8       | 0.029937468 | $1.24316 \times 10^{30}$ |
| <i>ARL2</i>               | 22 | 75.77272727 | 0.009530075 | $1.25977 \times 10^{29}$ |
| <i>RAB1B</i>              | 22 | 90.40909091 | 0.011291552 | $1.7685 \times 10^{29}$  |
| <i>RNF14</i>              | 22 | 260.45      | 0.030396719 | $1.2816 \times 10^{30}$  |
| <i>CHMP7</i>              | 22 | 68.77272727 | 0.008238804 | $9.41513 \times 10^{28}$ |
| <i>MRPS21</i>             | 22 | 77.68181818 | 0.009704774 | $1.25977 \times 10^{29}$ |
| <i>LSM4</i>               | 22 | 100.7272727 | 0.012970636 | $4.25719 \times 10^{29}$ |
| <i>TMEM38A</i>            | 21 | 263.6315789 | 0.029168445 | $1.18012 \times 10^{30}$ |
| <i>SGTA</i>               | 21 | 263.6315789 | 0.029168445 | $1.18012 \times 10^{30}$ |
| <i>CAPNS1</i>             | 21 | 263.6315789 | 0.029168445 | $1.18012 \times 10^{30}$ |
| <i>DNAJA3</i>             | 21 | 263.6315789 | 0.029168445 | $1.18012 \times 10^{30}$ |
| <i>ADH5</i>               | 21 | 92.0952381  | 0.010461128 | $1.51794 \times 10^{29}$ |
| <i>RNF185</i>             | 21 | 100.4761905 | 0.011793849 | $1.92934 \times 10^{29}$ |
| <i>SKI</i>                | 21 | 281.4210526 | 0.031138648 | $1.34492 \times 10^{30}$ |
| <i>SLTM</i>               | 21 | 263.6315789 | 0.029168445 | $1.18012 \times 10^{30}$ |
| <i>FECH</i>               | 21 | 270         | 0.030123963 | $1.2587 \times 10^{30}$  |
| <i>RPL37A</i>             | 21 | 250.5238095 | 0.031069304 | $1.33894 \times 10^{30}$ |
| <i>FKBP9</i>              | 21 | 247.6190476 | 0.030655684 | $1.33894 \times 10^{30}$ |
| <i>SLC35E1</i>            | 21 | 263.6315789 | 0.029168445 | $1.33894 \times 10^{30}$ |
| <i>TMED10</i>             | 20 | 110.9       | 0.013028903 | $2.35458 \times 10^{29}$ |
| <i>H1FO</i>               | 20 | 71          | 0.007640864 | $8.09809 \times 10^{28}$ |
| <i>EDC4</i>               | 20 | 249.0526316 | 0.027635893 | $1.05936 \times 10^{30}$ |
| <i>BYSL</i>               | 19 | 128.1052632 | 0.014923381 | $3.0891 \times 10^{29}$  |
| <i>TMEM<sup>30A</sup></i> | 19 | 273.8421053 | 0.030508357 | $1.29103 \times 10^{30}$ |
| <i>PSME3</i>              | 19 | 128.1052632 | 0.014923381 | $3.0891 \times 10^{29}$  |

|                  |    |             |             |                          |
|------------------|----|-------------|-------------|--------------------------|
| <i>UQCR10</i>    | 19 | 128.1052632 | 0.014923381 | $3.0891 \times 10^{29}$  |
| <i>UBE2V1</i>    | 19 | 128.1052632 | 0.014923381 | $3.0891 \times 10^{29}$  |
| <i>AURKAIP1</i>  | 19 | 109.1052632 | 0.012277005 | $2.09066 \times 10^{29}$ |
| <i>RPL27A</i>    | 19 | 128.1052632 | 0.014923381 | $3.0891 \times 10^{29}$  |
| <i>SDF4</i>      | 19 | 109.1052632 | 0.012277005 | $2.09066 \times 10^{29}$ |
| <i>COA3</i>      | 19 | 128.1052632 | 0.014923381 | $3.0891 \times 10^{29}$  |
| <i>VPS26A</i>    | 19 | 128.1052632 | 0.014923381 | $3.0891 \times 10^{29}$  |
| <i>SUCLG1</i>    | 19 | 271.9411765 | 0.026951254 | $1.00753 \times 10^{30}$ |
| <i>UBE2J2</i>    | 19 | 109.1052632 | 0.012277005 | $2.09066 \times 10^{29}$ |
| <i>PSMA1</i>     | 19 | 128.1052632 | 0.014923381 | $3.0891 \times 10^{29}$  |
| <i>NDUFB2</i>    | 19 | 128.1052632 | 0.014923381 | $3.0891 \times 10^{29}$  |
| <i>GABARAPL2</i> | 17 | 111.3529412 | 0.010569496 | $1.54955 \times 10^{29}$ |
| <i>COLGALT1</i>  | 17 | 102         | 0.009363501 | $1.21611 \times 10^{29}$ |
| <i>KAT2B</i>     | 17 | 292.8125    | 0.02730014  | $1.03378 \times 10^{30}$ |
| <i>HIBADH</i>    | 17 | 107.5882353 | 0.010752216 | $1.60359 \times 10^{29}$ |
| <i>TOLLIP</i>    | 17 | 101.4705882 | 0.009906341 | $1.36121 \times 10^{29}$ |
| <i>NDUFA4</i>    | 17 | 108.2941176 | 0.00994063  | $1.37065 \times 10^{29}$ |
| <i>VBP1</i>      | 16 | 337.4       | 0.029484208 | $1.2058 \times 10^{30}$  |
| <i>DOLK</i>      | 16 | 336.3333333 | 0.02939449  | $1.19848 \times 10^{30}$ |
| <i>NDE1</i>      | 16 | 131.1875    | 0.011584312 | $1.86139 \times 10^{29}$ |
| <i>PECAM1</i>    | 16 | 123.875     | 0.011017973 | $1.77 \times 10^{29}$    |
| <i>STUB1</i>     | 15 | 304.0666667 | 0.026772848 | $9.9423 \times 10^{29}$  |
| <i>YWHAB</i>     | 15 | 87.86666667 | 0.00704031  | $6.87514 \times 10^{28}$ |
| <i>CHCHD10</i>   | 15 | 114.3333333 | 0.009355117 | $1.21394 \times 10^{29}$ |
| <i>SNRNP27</i>   | 14 | 128.4285714 | 0.009828572 | $1.33992 \times 10^{29}$ |
| <i>SGPP1</i>     | 14 | 132.3571429 | 0.010927653 | $1.65635 \times 10^{29}$ |
| <i>BCL2L2</i>    | 14 | 128.4285714 | 0.009828572 | $1.33992 \times 10^{29}$ |
| <i>ADIPOR1</i>   | 14 | 128.4285714 | 0.009828572 | $1.33992 \times 10^{29}$ |
| <i>RPS2</i>      | 14 | 128.4285714 | 0.009828572 | $1.33992 \times 10^{29}$ |
| <i>NDUFA6</i>    | 14 | 102.8571429 | 0.007922111 | $8.70522 \times 10^{28}$ |
| <i>RNPS1</i>     | 14 | 128.4285714 | 0.009828572 | $1.33992 \times 10^{29}$ |
| <i>RNF103</i>    | 13 | 99.38461538 | 0.006889343 | $6.58345 \times 10^{28}$ |
| <i>BROX</i>      | 13 | 139.9230769 | 0.010075695 | $1.40815 \times 10^{29}$ |
| <i>OAZ1</i>      | 13 | 128.8461538 | 0.009544127 | $1.33992 \times 10^{29}$ |
| <i>PSMC4</i>     | 12 | 383.0833333 | 0.026809239 | $9.96935 \times 10^{29}$ |
| <i>FOXJ2</i>     | 12 | 383.0833333 | 0.026809239 | $9.96935 \times 10^{29}$ |
| <i>EIF3D</i>     | 12 | 383.0833333 | 0.026809239 | $9.96935 \times 10^{29}$ |
| <i>CSNK2A1</i>   | 12 | 383.0833333 | 0.026809239 | $9.96935 \times 10^{29}$ |
| <i>OGDH</i>      | 12 | 383.0833333 | 0.026809239 | $9.96935 \times 10^{29}$ |
| <i>PRDM4</i>     | 12 | 383.0833333 | 0.026809239 | $9.96935 \times 10^{29}$ |
| <i>CCNI</i>      | 12 | 383.0833333 | 0.026809239 | $9.96935 \times 10^{29}$ |
| <i>RTN2</i>      | 12 | 383.0833333 | 0.026809239 | $9.96935 \times 10^{29}$ |
| <i>NDUFA10</i>   | 12 | 383.0833333 | 0.026809239 | $9.96935 \times 10^{29}$ |
| <i>HRC</i>       | 12 | 383.0833333 | 0.026809239 | $9.96935 \times 10^{29}$ |
| <i>ATP6V1E1</i>  | 12 | 383.0833333 | 0.026809239 | $9.96935 \times 10^{29}$ |



|                |    |             |             |                          |
|----------------|----|-------------|-------------|--------------------------|
| <i>ABCB7</i>   | 12 | 383.0833333 | 0.026809239 | $9.96935 \times 10^{29}$ |
| <i>CAPN7</i>   | 12 | 383.0833333 | 0.026809239 | $9.96935 \times 10^{29}$ |
| <i>UTP3</i>    | 12 | 383.0833333 | 0.026809239 | $9.96935 \times 10^{29}$ |
| <i>MRPL44</i>  | 12 | 383.0833333 | 0.026809239 | $9.96935 \times 10^{29}$ |
| <i>PPP2R5A</i> | 12 | 383.0833333 | 0.026809239 | $9.96935 \times 10^{29}$ |
| <i>SNW1</i>    | 12 | 383.0833333 | 0.026809239 | $9.96935 \times 10^{29}$ |
| <i>MAP2K2</i>  | 12 | 383.0833333 | 0.026809239 | $9.96935 \times 10^{29}$ |
| <i>FAM20B</i>  | 12 | 383.0833333 | 0.026809239 | $9.96935 \times 10^{29}$ |
| <i>COPS4</i>   | 12 | 383.0833333 | 0.026809239 | $9.96935 \times 10^{29}$ |
| <i>ZFR</i>     | 12 | 383.0833333 | 0.026809239 | $9.96935 \times 10^{29}$ |
| <i>FBXO3</i>   | 12 | 383.0833333 | 0.026809239 | $9.96935 \times 10^{29}$ |
| <i>ETNK1</i>   | 12 | 383.0833333 | 0.026809239 | $9.96935 \times 10^{29}$ |
| <i>NDUFA9</i>  | 12 | 383.0833333 | 0.026809239 | $9.96935 \times 10^{29}$ |
| <i>FITM1</i>   | 12 | 383.0833333 | 0.026809239 | $9.96935 \times 10^{29}$ |
| <i>GALNT1</i>  | 12 | 383.0833333 | 0.026809239 | $9.96935 \times 10^{29}$ |
| <i>UBXN4</i>   | 12 | 383.0833333 | 0.026809239 | $9.96935 \times 10^{29}$ |
| <i>CDK16</i>   | 12 | 383.0833333 | 0.026809239 | $9.96935 \times 10^{29}$ |
| <i>PIGT</i>    | 12 | 383.0833333 | 0.026809239 | $9.96935 \times 10^{29}$ |
| <i>ACAD8</i>   | 12 | 383.0833333 | 0.026809239 | $9.96935 \times 10^{29}$ |
| <i>VPS26B</i>  | 12 | 383.0833333 | 0.026809239 | $9.96935 \times 10^{29}$ |
| <i>USP12</i>   | 12 | 383.0833333 | 0.026809239 | $9.96935 \times 10^{29}$ |
| <i>TMBIM4</i>  | 12 | 383.0833333 | 0.026809239 | $9.96935 \times 10^{29}$ |
| <i>NOMO1</i>   | 12 | 383.0833333 | 0.026809239 | $9.96935 \times 10^{29}$ |
| <i>OGFR</i>    | 12 | 383.0833333 | 0.026809239 | $9.96935 \times 10^{29}$ |
| <i>ABCE1</i>   | 12 | 383.0833333 | 0.026809239 | $9.96935 \times 10^{29}$ |
| <i>VPS35</i>   | 12 | 383.0833333 | 0.026809239 | $9.96935 \times 10^{29}$ |
| <i>SDHAF2</i>  | 12 | 149.6666667 | 0.009901817 | $1.35997 \times 10^{29}$ |
| <i>DDB1</i>    | 12 | 383.0833333 | 0.026809239 | $9.96935 \times 10^{29}$ |
| <i>UQCRFS1</i> | 12 | 383.0833333 | 0.026809239 | $9.96935 \times 10^{29}$ |
| <i>PRKACA</i>  | 12 | 383.0833333 | 0.026809239 | $9.96935 \times 10^{29}$ |
| <i>SRP68</i>   | 12 | 383.0833333 | 0.026809239 | $9.96935 \times 10^{29}$ |
| <i>HP1BP3</i>  | 12 | 383.0833333 | 0.026809239 | $9.96935 \times 10^{29}$ |
| <i>FBXW5</i>   | 12 | 383.0833333 | 0.026809239 | $9.96935 \times 10^{29}$ |
| <i>KHDRBS1</i> | 12 | 383.0833333 | 0.026809239 | $9.96935 \times 10^{29}$ |
| <i>DVL3</i>    | 12 | 383.0833333 | 0.026809239 | $9.96935 \times 10^{29}$ |
| <i>TCP1</i>    | 12 | 383.0833333 | 0.026809239 | $9.96935 \times 10^{29}$ |
| <i>NCL</i>     | 12 | 383.0833333 | 0.026809239 | $9.96935 \times 10^{29}$ |
| <i>YME1L1</i>  | 12 | 383.0833333 | 0.026809239 | $9.96935 \times 10^{29}$ |
| <i>PKM</i>     | 12 | 383.0833333 | 0.026809239 | $9.96935 \times 10^{29}$ |
| <i>GLYR1</i>   | 12 | 383.0833333 | 0.026809239 | $9.96935 \times 10^{29}$ |
| <i>HADHB</i>   | 12 | 383.0833333 | 0.026809239 | $9.96935 \times 10^{29}$ |
| <i>RUFY1</i>   | 12 | 383.0833333 | 0.026809239 | $9.96935 \times 10^{29}$ |
| <i>MDH2</i>    | 12 | 383.0833333 | 0.026809239 | $9.96935 \times 10^{29}$ |
| <i>MXI1</i>    | 12 | 383.0833333 | 0.026809239 | $9.96935 \times 10^{29}$ |
| <i>EEF1G</i>   | 12 | 383.0833333 | 0.026809239 | $9.96935 \times 10^{29}$ |

|                |    |             |             |                          |
|----------------|----|-------------|-------------|--------------------------|
| <i>MTA1</i>    | 12 | 383.0833333 | 0.026809239 | $9.96935 \times 10^{29}$ |
| <i>FOXK2</i>   | 12 | 383.0833333 | 0.026809239 | $9.96935 \times 10^{29}$ |
| <i>UBA1</i>    | 12 | 383.0833333 | 0.026809239 | $9.96935 \times 10^{29}$ |
| <i>MIOS</i>    | 12 | 383.0833333 | 0.026809239 | $9.96935 \times 10^{29}$ |
| <i>SSX2IP</i>  | 12 | 383.0833333 | 0.026809239 | $9.96935 \times 10^{29}$ |
| <i>PHF10</i>   | 12 | 383.0833333 | 0.026809239 | $9.96935 \times 10^{29}$ |
| <i>SERINC1</i> | 12 | 383.0833333 | 0.026809239 | $9.96935 \times 10^{29}$ |
| <i>CDH5</i>    | 12 | 383.0833333 | 0.026809239 | $9.96935 \times 10^{29}$ |
| <i>VCP</i>     | 12 | 383.0833333 | 0.026809239 | $9.96935 \times 10^{29}$ |
| <i>LONP1</i>   | 12 | 383.0833333 | 0.026809239 | $9.96935 \times 10^{29}$ |
| <i>UBA3</i>    | 12 | 383.0833333 | 0.026809239 | $9.96935 \times 10^{29}$ |
| <i>DCTN1</i>   | 12 | 383.0833333 | 0.026809239 | $9.96935 \times 10^{29}$ |
| <i>GNPAT</i>   | 12 | 383.0833333 | 0.026809239 | $9.96935 \times 10^{29}$ |
| <i>HDGF</i>    | 12 | 150.9166667 | 0.010338784 | $1.48264 \times 10^{29}$ |
| <i>BCCIP</i>   | 12 | 383.0833333 | 0.026809239 | $9.96935 \times 10^{29}$ |
| <i>BUB3</i>    | 12 | 383.0833333 | 0.026809239 | $9.96935 \times 10^{29}$ |
| <i>ATP6AP1</i> | 12 | 383.0833333 | 0.026809239 | $9.96935 \times 10^{29}$ |
| <i>GHITM</i>   | 12 | 383.0833333 | 0.026809239 | $9.96935 \times 10^{29}$ |
| <i>VDAC2</i>   | 12 | 383.0833333 | 0.026809239 | $9.96935 \times 10^{29}$ |
| <i>PPA1</i>    | 12 | 383.0833333 | 0.026809239 | $9.96935 \times 10^{29}$ |
| <i>KPNA6</i>   | 12 | 383.0833333 | 0.026809239 | $9.96935 \times 10^{29}$ |
| <i>SRSF4</i>   | 12 | 383.0833333 | 0.026809239 | $9.96935 \times 10^{29}$ |
| <i>RPL10A</i>  | 12 | 150.9166667 | 0.010338784 | $1.48264 \times 10^{29}$ |
| <i>ALDH4A1</i> | 12 | 383.0833333 | 0.026809239 | $9.96935 \times 10^{29}$ |
| <i>UBQLN1</i>  | 12 | 383.0833333 | 0.026809239 | $9.96935 \times 10^{29}$ |
| <i>TCOF1</i>   | 12 | 383.0833333 | 0.026809239 | $9.96935 \times 10^{29}$ |
| <i>CENPB</i>   | 12 | 383.0833333 | 0.026809239 | $9.96935 \times 10^{29}$ |
| <i>HADHA</i>   | 12 | 383.0833333 | 0.026809239 | $9.96935 \times 10^{29}$ |
| <i>IDH3B</i>   | 12 | 383.0833333 | 0.026809239 | $9.96935 \times 10^{29}$ |
| <i>NUPL1</i>   | 12 | 383.0833333 | 0.026809239 | $9.96935 \times 10^{29}$ |
| <i>MTMR6</i>   | 12 | 383.0833333 | 0.026809239 | $9.96935 \times 10^{29}$ |
| <i>RHBDD1</i>  | 12 | 383.0833333 | 0.026809239 | $9.96935 \times 10^{29}$ |
| <i>CCT4</i>    | 12 | 383.0833333 | 0.026809239 | $9.96935 \times 10^{29}$ |
| <i>ULK2</i>    | 12 | 383.0833333 | 0.026809239 | $9.96935 \times 10^{29}$ |
| <i>PLAA</i>    | 12 | 383.0833333 | 0.026809239 | $9.96935 \times 10^{29}$ |
| <i>KCMF1</i>   | 12 | 383.0833333 | 0.026809239 | $9.96935 \times 10^{29}$ |
| <i>IMMT</i>    | 12 | 383.0833333 | 0.026809239 | $9.96935 \times 10^{29}$ |
| <i>NDUFS1</i>  | 12 | 383.0833333 | 0.026809239 | $9.96935 \times 10^{29}$ |
| <i>ECD</i>     | 12 | 383.0833333 | 0.026809239 | $9.96935 \times 10^{29}$ |
| <i>HHATL</i>   | 12 | 383.0833333 | 0.026809239 | $9.96935 \times 10^{29}$ |
| <i>PPP2R5D</i> | 12 | 383.0833333 | 0.026809239 | $9.96935 \times 10^{29}$ |
| <i>UHMK1</i>   | 12 | 383.0833333 | 0.026809239 | $9.96935 \times 10^{29}$ |
| <i>ETFDH</i>   | 12 | 383.0833333 | 0.026809239 | $9.96935 \times 10^{29}$ |
| <i>HDAC2</i>   | 12 | 383.0833333 | 0.026809239 | 9.969351                 |
| <i>CCDC90B</i> | 12 | 383.0833333 | 0.026809239 | 9.969351                 |

|                           |    |             |             |                          |
|---------------------------|----|-------------|-------------|--------------------------|
| <i>DPF2</i>               | 12 | 383.0833333 | 0.026809239 | 9.969351                 |
| <i>TPCN1</i>              | 12 | 383.0833333 | 0.026809239 | 9.969351                 |
| <i>NDRG2</i>              | 12 | 383.0833333 | 0.026809239 | 9.969351                 |
| <i>DDX42</i>              | 12 | 383.0833333 | 0.026809239 | 9.969351                 |
| <i>DNAJC3</i>             | 12 | 383.0833333 | 0.026809239 | 9.969351                 |
| <i>STIM1</i>              | 12 | 383.0833333 | 0.026809239 | 9.969351                 |
| <i>RAB18</i>              | 12 | 383.0833333 | 0.026809239 | 9.969351                 |
| <i>HNRNPDL</i>            | 12 | 383.0833333 | 0.026809239 | 9.969351                 |
| <i>BAG1</i>               | 11 | 128.9090909 | 0.007721052 | $8.26896 \times 10^{28}$ |
| <i>RPL19</i>              | 10 | 154.9       | 0.008483177 | $9.98194 \times 10^{28}$ |
| <i>TERF2IP</i>            | 10 | 169.1       | 0.009235879 | $1.18319 \times 10^{29}$ |
| <i>PEF1</i>               | 10 | 154.9       | 0.008483177 | $9.98194 \times 10^{28}$ |
| <i>LSM12</i>              | 10 | 124.8       | 0.006629217 | $9.98194 \times 10^{28}$ |
| <i>TUSC2</i>              | 9  | 149.8888889 | 0.007254903 | $7.30064 \times 10^{28}$ |
| <i>TXNL4A</i>             | 9  | 149.8888889 | 0.007254903 | $7.30064 \times 10^{28}$ |
| <i>PAM16</i>              | 9  | 149.8888889 | 0.007254903 | $7.30064 \times 10^{28}$ |
| <i>MPC2</i>               | 9  | 149.8888889 | 0.007254903 | $7.30064 \times 10^{28}$ |
| <i>TMBIM6</i>             | 9  | 149.8888889 | 0.007254903 | $7.30064 \times 10^{28}$ |
| <i>TNNC1</i>              | 8  | 152.75      | 0.00647825  | $5.82121 \times 10^{28}$ |
| <i>THAP11</i>             | 8  | 75.875      | 0.003276712 | $1.48927 \times 10^{28}$ |
| <i>DNAJC<sup>30</sup></i> | 8  | 75.875      | 0.003276712 | $1.48927 \times 10^{28}$ |
| <i>PNO1</i>               | 6  | 165.6666667 | 0.005483689 | $4.17103 \times 10^{28}$ |
| <i>NDUFB9</i>             | 6  | 164.1666667 | 0.00543306  | $4.09437 \times 10^{28}$ |
| <i>ARL1</i>               | 5  | 113         | 0.002970556 | $1.22398 \times 10^{28}$ |
| <i>RPS7</i>               | 4  | 127         | 0.002646935 | $9.71817 \times 10^{27}$ |
| <i>PAIP2</i>              | 4  | 127         | 0.002646935 | $9.71817 \times 10^{27}$ |
| <i>BUD31</i>              | 1  | 4           | 1.07729E-05 | $1.60978 \times 10^{23}$ |

Table S2. Network measures for the Drug nodes in the Drug Disease Knowledge Graph (DDKG).

| Drug Names      | Degree | Neighborhood Connectivity | Eigenvector Centrality | Subgraph Centrality |
|-----------------|--------|---------------------------|------------------------|---------------------|
| DOXORUBICIN     | 21     | 10                        | $3.01 \times 10^{-15}$ | 994,567.015         |
| ARCITUMOMAB     | 76     | 10                        | $1.24 \times 10^{-14}$ | 17,301,295.9        |
| NELARABINE      | 21     | 10                        | $3.03 \times 10^{-15}$ | 994,567.015         |
| IFOSFAMIDE      | 21     | 10                        | $3 \times 10^{-15}$    | 994,567.015         |
| IXABEPILONE     | 21     | 10                        | $3.01 \times 10^{-15}$ | 994,567.015         |
| IMATINIB        | 21     | 10                        | $2.96 \times 10^{-15}$ | 994,567.015         |
| ETOPOSIDE       | 37     | 10                        | $6.2 \times 10^{-15}$  | 4,284,550.57        |
| NIMODIPINE      | 49     | 10                        | $8.13 \times 10^{-15}$ | 7,458,879.19        |
| TEMOZOLOMIDE    | 12     | 10                        | $1.53 \times 10^{-15}$ | 251,605.014         |
| METHOTREXATE    | 12     | 10                        | $1.5 \times 10^{-15}$  | 251,605.014         |
| CANAGLIFLOZIN   | 17     | 10                        | $2.55 \times 10^{-16}$ | 25,038.3588         |
| INSULIN REGULAR | 17     | 10                        | $2.62 \times 10^{-16}$ | 25,038.3588         |

|                    |    |    |                         |              |
|--------------------|----|----|-------------------------|--------------|
| INSULIN LISPRO     | 17 | 10 | $2.3 \times 10^{-16}$   | 25,038.3588  |
| INSULIN ASPART     | 17 | 10 | $2.25 \times 10^{-16}$  | 25,038.3588  |
| INSULIN GLARGINE   | 17 | 10 | $2.67 \times 10^{-16}$  | 25,038.3588  |
| INSULIN, ISOPHANE  | 17 | 10 | $2.33 \times 10^{-16}$  | 25,038.3588  |
| INSULIN GLULISINE  | 17 | 10 | $2.22 \times 10^{-16}$  | 25,038.3588  |
| INSULIN DETEMIR    | 17 | 10 | $2.45 \times 10^{-16}$  | 25,038.3588  |
| PRAMLINTIDE        | 17 | 10 | $2.36 \times 10^{-16}$  | 25,038.3588  |
| L-CARNITINE        | 58 | 10 | $6.47 \times 10^{-16}$  | 272,705.747  |
| TRANLYCYPROMINE    | 6  | 10 | $-3.73 \times 10^{-18}$ | 126.740606   |
| FLUOXETINE         | 7  | 10 | $1.18 \times 10^{-17}$  | 151.497096   |
| MAPROTILINE        | 7  | 10 | $-2.98 \times 10^{-17}$ | 151.497096   |
| RISPERIDONE        | 6  | 10 | $-1.61 \times 10^{-17}$ | 126.740606   |
| SERTRALINE         | 7  | 10 | $-2.5 \times 10^{-17}$  | 151.497096   |
| PAROXETINE         | 7  | 10 | $8.68 \times 10^{-18}$  | 151.497096   |
| LAMOTRIGINE        | 6  | 10 | $1.33 \times 10^{-17}$  | 126.740606   |
| PHENELZINE         | 7  | 10 | $-5.5 \times 10^{-18}$  | 151.497096   |
| VENLAFAXINE        | 6  | 10 | $-2.47 \times 10^{-17}$ | 126.740606   |
| ISOCARBOXAZID      | 6  | 10 | $8.71 \times 10^{-18}$  | 126.740606   |
| L-CARNITINE        | 58 | 10 | $2.26 \times 10^{-15}$  | 6,846,278.94 |
| THIAMINE           | 35 | 10 | $2.31 \times 10^{-15}$  | 6,846,278.94 |
| GALSULFASE         | 35 | 10 | $2.29 \times 10^{-15}$  | 6,846,278.94 |
| IDURSULFASE        | 35 | 10 | $2.3 \times 10^{-15}$   | 6,846,278.94 |
| ROSUVASTATIN       | 35 | 10 | $2.3 \times 10^{-15}$   | 6,846,278.94 |
| CYSTEAMINE         | 35 | 10 | $2.31 \times 10^{-15}$  | 6,846,278.94 |
| AGALSIDASE BETA    | 35 | 10 | $2.26 \times 10^{-15}$  | 6,846,278.94 |
| VITAMIN C          | 35 | 10 | $2.32 \times 10^{-15}$  | 6,846,278.94 |
| RIBOFLAVIN         | 35 | 10 | $2.3 \times 10^{-15}$   | 6,846,278.94 |
| CALCIUM ACETATE    | 35 | 10 | $2.31 \times 10^{-15}$  | 6,846,278.94 |
| KETOCONAZOLE       | 39 | 10 | 0.2236068               | 18,862,482.1 |
| SULFISOXAZOLE      | 39 | 10 | 0.2236068               | 18,862,482.1 |
| TINIDAZOLE         | 39 | 10 | 0.2236068               | 18,862,482.1 |
| CHLOROQUINE        | 39 | 10 | 0.2236068               | 18,862,482.1 |
| TETRACYCLINE       | 39 | 10 | 0.2236068               | 18,862,482.1 |
| IVERMECTIN         | 39 | 10 | 0.2236068               | 18,862,482.1 |
| PIPERAZINE         | 39 | 10 | 0.2236068               | 18,862,482.1 |
| SURAMIN            | 39 | 10 | 0.2236068               | 18,862,482.1 |
| DIETHYLCARBAMAZINE | 39 | 10 | 0.2236068               | 18,862,482.1 |
| ALBENDAZOLE        | 39 | 10 | 0.2236068               | 18,862,482.1 |
| BUDESONIDE         | 22 | 10 | $2.46 \times 10^{-16}$  | 138,229.581  |
| OLSALAZINE         | 22 | 10 | $2.48 \times 10^{-16}$  | 138,229.581  |
| BALSALAZIDE        | 22 | 10 | $2.2 \times 10^{-16}$   | 138,229.581  |
| HYDROCORTISONE     | 22 | 10 | $2.24 \times 10^{-16}$  | 138,229.581  |
| SULFASALAZINE      | 22 | 10 | $2.25 \times 10^{-16}$  | 138,229.581  |

|                        |    |    |                         |              |
|------------------------|----|----|-------------------------|--------------|
| CERTOLIZUMAB PEGOL     | 22 | 10 | $2.27 \times 10^{-16}$  | 138,229.581  |
| AZATHIOPRINE           | 22 | 10 | $2 \times 10^{-16}$     | 138,229.581  |
| INFLIXIMAB             | 22 | 10 | $2.38 \times 10^{-16}$  | 138,229.581  |
| GOLIMUMAB              | 22 | 10 | $2.22 \times 10^{-16}$  | 138,229.581  |
| ADALIMUMAB             | 22 | 10 | $2.44 \times 10^{-16}$  | 138,229.581  |
| L-ARGININE             | 50 | 10 | $8.85 \times 10^{-15}$  | 8,954,934.94 |
| HYDRALAZINE            | 45 | 10 | $8.47 \times 10^{-15}$  | 8,223,630.15 |
| MEMANTINE              | 9  | 9  | $1.51 \times 10^{-15}$  | 255,174.059  |
| GALANTAMINE            | 1  | 5  | $7.07 \times 10^{-17}$  | 839.253743   |
| PREDNISONE             | 54 | 10 | $9.27 \times 10^{-15}$  | 9,859,840.45 |
| PREDNISOLONE           | 49 | 10 | $8.81 \times 10^{-15}$  | 8,890,290.51 |
| WARFARIN               | 19 | 10 | $3.63 \times 10^{-15}$  | 1,523,624.8  |
| DICHLORPHENAMIDE       | 7  | 10 | $1.24 \times 10^{-15}$  | 171,139.347  |
| FLUOCINOLONE           |    |    |                         |              |
| ACETONIDE              | 7  | 10 | $1.24 \times 10^{-15}$  | 171,139.347  |
| LOTEPREDNOL            | 7  | 10 | $1.23 \times 10^{-15}$  | 171,139.347  |
| L-ORNITHINE            | 43 | 10 | $8.26 \times 10^{-15}$  | 7,770,468.81 |
| ANASTROZOLE            | 8  | 10 | $1.42 \times 10^{-15}$  | 226,794.168  |
| CINNARIZINE            | 8  | 10 | $1.42 \times 10^{-15}$  | 226,794.168  |
| VERAPAMIL              | 20 | 10 | $3.86 \times 10^{-15}$  | 1,681,914.24 |
| N-ACETYL-D-GLUCOSAMINE | 6  | 10 | $5.64 \times 10^{-16}$  | 37,755.8589  |
| INDOMETHACIN           | 6  | 10 | $5.62 \times 10^{-16}$  | 37,755.8589  |
| DIHYDROTACHYSTEROL     | 6  | 10 | $5.67 \times 10^{-16}$  | 37,755.8589  |
| ERGOCALCIFEROL         | 6  | 10 | $5.52 \times 10^{-16}$  | 37,755.8589  |
| IBUPROFEN              | 6  | 10 | $5.85 \times 10^{-16}$  | 37,755.8589  |
| DESMOPRESSIN           | 6  | 10 | $5.85 \times 10^{-16}$  | 37,755.8589  |
| ALENDRONATE            | 6  | 10 | $5.76 \times 10^{-16}$  | 37,755.8589  |
| ENOXAPARIN             | 5  | 10 | $4.58 \times 10^{-16}$  | 25,126.9     |
| HEPARIN                | 5  | 10 | $4.71 \times 10^{-16}$  | 25,126.9     |
| UROKINASE              | 5  | 10 | $4.66 \times 10^{-16}$  | 25,126.9     |
| STREPTOKINASE          | 5  | 10 | $4.81 \times 10^{-16}$  | 25,126.9     |
| ACENOCOUMAROL          | 5  | 10 | $4.69 \times 10^{-16}$  | 25,126.9     |
| ARGATROBAN             | 5  | 10 | $4.71 \times 10^{-16}$  | 25,126.9     |
| NADROPARIN             | 5  | 10 | $4.65 \times 10^{-16}$  | 25,126.9     |
| LUCINACTANT            | 16 | 10 | $3.16 \times 10^{-15}$  | 1,160,436.78 |
| CLINDAMYCIN            | 16 | 10 | $3.15 \times 10^{-15}$  | 1,160,436.78 |
| TELITHROMYCIN          | 16 | 10 | $3.16 \times 10^{-15}$  | 1,160,436.78 |
| MELATONIN              | 1  | 10 | $-1.08 \times 10^{-18}$ | 2.95815542   |
| AMPHETAMINE            | 1  | 10 | $1.04 \times 10^{-17}$  | 2.95815542   |
| CITALOPRAM             | 1  | 10 | $1.01 \times 10^{-17}$  | 2.95815542   |
| AMISULPRIDE            | 1  | 10 | $5.15 \times 10^{-18}$  | 2.95815542   |
| FLUVOXAMINE            | 1  | 10 | $-9.29 \times 10^{-18}$ | 2.95815542   |
| ISOPROPAMIDE           | 7  | 10 | $1.43 \times 10^{-15}$  | 230,272.897  |

|             |   |    |                        |             |
|-------------|---|----|------------------------|-------------|
| DRONEDARONE | 5 | 10 | $1.02 \times 10^{-15}$ | 116,165.404 |
|-------------|---|----|------------------------|-------------|
